# Supplementary material for: The Major Fusarium Species Causing Maize Ear and Kernel Rot and Their Toxigenicity in Chongqing, China
Source: PubMed Central journal article supplement (PMC5848190; doi:10.3390/toxins10020090), 2018-02-22
Supplement: toxins-10-00090-s001.pdf [file toxins-10-00090-s001.pdf]

# Supplementary Materials: The Major *Fusarium* Species Causing Maize Ear and Kernel Rot and Their Toxigenicity in Chongqing, China

Danli Zhou, Xiaoming Wang, Guokang Chen, Suli Sun, Yang Yang, Zhendong Zhu and Canxing Duan

Table S1. Sampling information.

| Sample Location | Number of Samples | Elevation (m) | Average Precipitation (mm) | Sample Year |
|-----------------|-------------------|---------------|----------------------------|-------------|
| Beibei          | 9                 | 175-1312m     | 1201                       | 2014        |
| Hechuan         | 3                 | 185-1285      | 1213                       | 2014        |
| Xiushan         | 6                 | 246-1631      | 1323                       | 2014        |
| Fulin           | 1                 | 138-1977      | 1090                       | 2014        |
| Jiangjin        | 6                 | 179-1709      | 1035                       | 2014        |
| Chengkou        | 3                 | 482-2686      | 1246                       | 2014        |
| Tongliang       | 1                 | 185-902       | 1068                       | 2014        |
| Wanzhou         | 1                 | 106-1762      | 1211                       | 2014        |
| Yongchuan       | 4                 | 180-420       | 1045                       | 2014        |
| Fengdu          | 4                 | 175-2000      | 1080                       | 2014        |
| Bazhong         | 2                 | 267-2513      | 1124                       | 2014        |
| Chengdu         | 4                 | 380-3000      | 1100                       | 2014        |
| Neijiang        | 4                 | 300-500       | 1035                       | 2014        |
| Xichang         | 1                 | 1500-2500     | 1088                       | 2014        |
| Ziyang          | 2                 | 300-550       | 955                        | 2014        |
| Yibing          | 6                 | 270-1418      | 1168                       | 2014        |
| Yunyang         | 1                 | 139-1809      | 1118                       | 2015        |
| Xiushan         | 3                 | 246-1631      | 1350                       | 2015        |
| Youyang         | 2                 | 263-1895      | 1356                       | 2015        |
| Chengkou        | 2                 | 482-2686      | 1263                       | 2015        |
| Dianjiang       | 3                 | 320-1183      | 1179                       | 2015        |
| Jiulongpo       | 1                 | 180-450       | 1056                       | 2015        |
| Nanchuan        | 2                 | 340-2251      | 1156                       | 2015        |
| Qijiang         | 2                 | 188-1973      | 1076                       | 2015        |
| Rongchang       | 3                 | 300-711       | 1119                       | 2015        |
| Wansheng        | 2                 | 265-1973      | 1303                       | 2015        |
| Wulong          | 2                 | 160-2033      | 1079                       | 2015        |
| Shizhu          | 3                 | 119-1934      | 1112                       | 2015        |
| Zhongxian       | 1                 | 117-1680      | 1185                       | 2015        |
| Tongnan         | 2                 | 300-450       | 975                        | 2015        |
| Wanzhou         | 3                 | 106-1762      | 1194                       | 2015        |
| Wuxi            | 2                 | 139-2796      | 1140                       | 2015        |
| Yongchuan       | 2                 | 180-420       | 1089                       | 2015        |
| Changshou       | 2                 | 300-1034      | 1145                       | 2015        |
| Dazu            | 2                 | 270-934       | 1007                       | 2015        |
| Kaixian         | 2                 | 134-2626      | 1228                       | 2015        |
| Pengshui        | 2                 | 612-1084      | 1227                       | 2015        |
| Qianjiang       | 2                 | 320-1939      | 1203                       | 2015        |
